# Supplementary material for: Revision Surgery and Progression to Total Hip Arthroplasty After Surgical Correction of Femoroacetabular Impingement: A Systematic Review
Source: PubMed Central journal article supplement (PMC8980457; doi:10.1177/03635465211011744), 2021-06-03
Supplement: sj-pdf-1-ajs-10.1177_03635465211011744.pdf [file sj-pdf-1-ajs-10.1177_03635465211011744.pdf]

**Appendix Table A1.** Overall results of the multivariate analysis

| Endpoint                              | Revision Surgeries |          |          | Total Hip Arthroplasty |          |          |
|---------------------------------------|--------------------|----------|----------|------------------------|----------|----------|
|                                       | Observations       | <i>r</i> | <i>P</i> | Observations           | <i>r</i> | <i>P</i> |
| Mean Age                              | 36                 | -0.14    | 0.4      | 44                     | 0.26     | 0.1      |
| Female sex                            | 32                 | 0.12     | 0.5      | 37                     | 0.06     | 0.7      |
| BMI                                   | 25                 | 0.00     | 1.0      | 23                     | 0.43     | 0.03     |
| Right Side                            | 12                 | 0.42     | 0.2      | 14                     | -0.04    | 0.9      |
| Labral debridement                    | 6                  | -0.56    | 0.2      | 23                     | 0.77     | < 0.0001 |
| Labral repair                         | 8                  | -0.24    | 0.6      | 30                     | 0.11     | 0.6      |
| Labral reconstruction                 | 2                  | -1.00    | 1.0      | 11                     | -0.03    | 0.9      |
| Capsular repair                       | 0                  |          |          | 11                     | -0.57    | 0.1      |
| Acetabular index pre-op               | 2                  | 1.00     | 1.0      | 6                      | 0.89     | 0.01     |
| Acetabular index post-op              | 2                  | 1.00     | 1.0      | 5                      | -0.60    | 0.3      |
| Caudocranial femoral coverage post-op | 0                  |          |          | 3                      | 0.73     | 0.5      |
| Anterior femoral coverage pre-op      | 0                  |          |          | 3                      | -0.93    | 0.2      |
| Anterior femoral coverage post-op     | 0                  |          |          | 3                      | 0.99     | 0.1      |
| Posterior femoral coverage pre-op     | 0                  |          |          | 3                      | -0.92    | 0.3      |
| Posterior femoral coverage post-op    | 0                  |          |          | 3                      | -0.98    | 0.1      |
| Medial joint space pre-op             | 0                  |          |          | 4                      | -0.15    | 0.8      |
| Foveal joint space pre-op             | 0                  |          |          | 2                      | 1.00     | 1.0      |
| Lateral joint space pre-op            | 0                  |          |          | 5                      | 0.19     | 0.8      |
| Femoral offset pre-op                 | 0                  |          |          | 3                      | 0.77     | 0.4      |
| Femoral offset post-op                | 0                  |          |          | 0                      |          |          |
| VAS pre-op                            | 11                 | -0.24    | 0.5      | 14                     | 0.31     | 0.3      |
| VAS post-op                           | 11                 | -0.14    | 0.7      | 14                     | 0.12     | 0.7      |
| Tönnis pre-op                         | 12                 | -0.26    | 0.4      | 9                      | -0.25    | 0.5      |
| Tönnis post-op                        | 5                  | 0.69     | 0.2      | 3                      | 0.98     | 0.1      |
| Alfa angle pre-op                     | 20                 | -0.18    | 0.5      | 25                     | -0.10    | 0.6      |
| Alfa angle post-op                    | 10                 | -0.33    | 0.3      | 14                     | 0.24     | 0.4      |
| Gamma angle pre-op                    |                    |          |          |                        |          |          |
| Gamma angle post-op                   |                    |          |          |                        |          |          |
| Sharp angle post-op                   | 0                  |          |          | 3                      | 0.42     | 0.7      |
| CEA pre-op                            | 4                  | -0.44    | 0.6      | 7                      | 0.35     | 0.4      |
| CEA post-op                           | 0                  |          |          | 0                      |          |          |
| aCEA pre-op                           | 5                  | 0.18     | 0.8      | 5                      | 0.12     | 0.9      |
| aCEA post-op                          | 0                  |          |          | 0                      |          |          |
| ICEA pre-op                           | 20                 | -0.01    | 1.0      | 18                     | -0.05    | 0.8      |
| ICEA post-op                          | 5                  | -0.54    | 0.3      | 4                      | -0.90    | 0.1      |
| Flexion pre-op                        | 11                 | 0.43     | 0.2      | 11                     | -0.07    | 0.8      |
| Flexion post-op                       | 4                  | -0.71    | 0.3      | 2                      | -1.00    | 1.0      |
| Extention pre-op                      | 0                  |          |          | 0                      |          |          |
| Extention post-op                     | 0                  |          |          | 0                      |          |          |
| Abduction pre-op                      | 7                  | 0.08     | 0.9      | 8                      | -0.37    | 0.4      |
| Abduction post-op                     | 0                  |          |          | 0                      |          |          |
| Adduction pre-op                      | 2                  | 1.00     | 0.0      | 3                      | -0.99    | 0.1      |
| Adduction post-op                     | 0                  |          |          | 0                      |          |          |

|                                    |    |       |     |    |       |     |
|------------------------------------|----|-------|-----|----|-------|-----|
| Internal rotation pre-op           | 11 | 0.25  | 0.5 | 12 | 0.23  | 0.5 |
| Internal rotation post-op          | 4  | 0.89  | 0.1 | 4  | 0.74  | 0.3 |
| External rotation pre-op           | 11 | 0.34  | 0.3 | 10 | -0.16 | 0.7 |
| External rotation post-op          | 4  | -0.04 | 1.0 | 2  | -1.00 | 1.0 |
| Anterior impingement test pre-op   | 6  | -0.35 | 0.5 | 5  | 0.41  | 0.5 |
| Anterior impingement test post-op  | 0  |       |     | 0  |       |     |
| Lateral impingement test pre-op    | 3  | -0.35 | 0.8 | 3  | 0.67  | 0.5 |
| Lateral impingement test post-op   | 0  |       |     | 0  |       |     |
| Posterior impingement test pre-op  | 3  | -0.20 | 0.9 | 3  | 0.09  | 0.9 |
| Posterior impingement test post-op | 0  |       |     | 0  |       |     |
| Cross sign pre-op                  | 5  | 0.57  | 0.3 | 5  | -0.20 | 0.7 |
| Cross sign post-op                 | 2  | 1.00  | 1.0 | 0  |       |     |
| Tönnis 0 pre-op                    | 12 | 0.05  | 0.9 | 17 | 0.08  | 0.8 |
| Tönnis I pre-op                    | 11 | -0.12 | 0.7 | 16 | 0.02  | 0.9 |
| Tönnis II pre-op                   | 4  | -0.84 | 0.2 | 8  | -0.02 | 1.0 |
| Tönnis 0 post-op                   | 2  | 1.00  | 1.0 | 2  | -1.00 | 1.0 |
| Tönnis I post-op                   | 2  | 1.00  | 1.0 | 3  | 0.39  | 0.7 |
| Tönnis II post-op                  | 2  | -1.00 | 1.0 | 3  | 0.99  | 0.1 |
| Harris Hip Score pre-op            | 28 | 0.10  | 0.6 | 30 | -0.27 | 0.1 |
| Harris Hip Score post-op           | 30 | -0.17 | 0.4 | 33 | -0.14 | 0.4 |
| NAHS pre-op                        | 16 | 0.13  | 0.6 | 17 | -0.05 | 0.9 |
| NAHS post-op                       | 16 | 0.18  | 0.5 | 17 | -0.14 | 0.6 |
| SF-36 Physical pre-op              | 5  | -0.09 | 0.9 | 6  | -0.40 | 0.4 |
| SF-36 Physical post-op             | 5  | -0.34 | 0.6 | 6  | -0.54 | 0.3 |
| SF-36 Mental pre-op                | 5  | -0.39 | 0.5 | 5  | 0.94  | 0.2 |
| SF-36 Mental post-op               | 5  | -0.26 | 0.7 | 5  | 0.47  | 0.4 |
| HOS ADL pre-op                     | 19 | 0.05  | 0.8 | 13 | 0.15  | 0.6 |
| HOS ADL post-op                    | 19 | 0.05  | 0.8 | 13 | -0.61 | 0.3 |
| HOS-SSS pre-op                     | 24 | 0.00  | 1.0 | 18 | -0.16 | 0.5 |
| HOS-SSS post-op                    | 26 | 0.09  | 0.7 | 20 | -0.37 | 0.1 |
| iHOT 12 pre-op                     | 0  |       |     | 0  |       |     |
| iHOT 12 post-op                    | 4  | -0.07 | 0.9 | 5  | -0.24 | 0.7 |
| Return to sport                    | 3  | -0.90 | 0.3 | 2  | 1.00  | 1.0 |
